# Supplementary material for: Prognostic Relevance of Circulating Tumor Cells and Circulating Cell-Free DNA Association in Metastatic Non-Small Cell Lung Cancer Treated with Nivolumab
Source: MDPI journal article supplement (doi:10.3390/jcm8071011), 2019-07-10
Supplement: s1 [file s1]

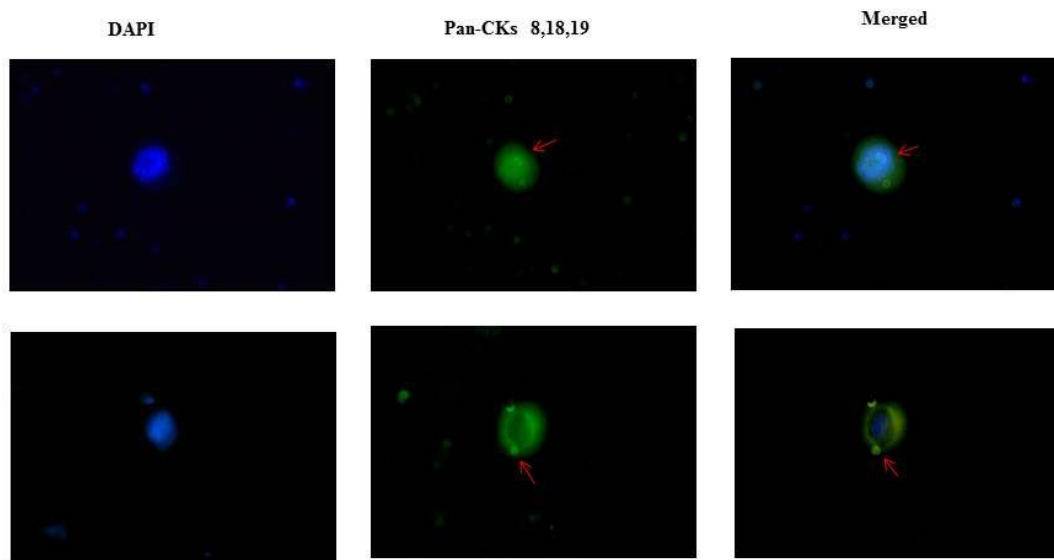

**Figure S1.** Immunofluorescence analysis of NSCLC cells entrapped on a ScreenCell Cyto device filter. Cells are stained with anti-CD45 , Pan-CKs 8,18,19 and 4',6-diamino-2-phenylindole (DAPI). Cells with DAPI-positive nucleus, positive for CK staining in the cytoplasm, and negative for CD45 were considered to be CTCs. The red arrows indicate membrane pores ( $7.5 \pm 0.36 \mu\text{m}$ ).
